# Supplementary material for: The half-sandwich 18- and 16-electron arene ruthenium iminophosphonamide complexes
Source: Royal Society of Chemistry journal article supplement (doi:10.1039/c6dt03202h), 2016-01-01

**Electronic Supplementary Information**  
**for the article**

**The Half-sandwich 18- and 16-electron Arene Ruthenium  
Iminophosphonamide Complexes**

Tat'yana A. Peganova,<sup>a</sup> Iana S. Sinopalnikova,<sup>a</sup> Alexander S. Peregudov,<sup>a</sup> Ivan V. Fedyanin,<sup>a</sup>  
Albert Demonceau,<sup>b</sup> Nikolai A. Ustynyuk,<sup>a</sup> Alexander M. Kalsin<sup>a\*</sup>

<sup>a</sup> A.N. Nesmeyanov Institute of Organoelement Compounds, Russian Academy of Sciences, 28 Vavilov str., 119991 Moscow, Russia

<sup>b</sup> Laboratory of Macromolecular Chemistry and Organic Catalysis, Department of Chemistry, University of Liège, Sart-Tilman (B6a), 4000 Liège, Belgium

1. Complete crystallographic data for the complexes  $[(\eta^6\text{-C}_6\text{Me}_6)\text{RuCl}\{(p\text{-TolN})_2\text{PPh}_2\}]$  (**3a**),  $[(\eta^6\text{-C}_6\text{Me}_6)\text{RuCl}\{(p\text{-TolN})_2\text{PEt}_2\}]$  (**3b**),  $[(\eta^6\text{-C}_6\text{Me}_6)\text{RuCl}\{(\text{MeN})_2\text{PPh}_2\}]$  (**3c**),  $[(\eta^6\text{-C}_6\text{Me}_6)\text{Ru}\{(p\text{-TolN})_2\text{PPh}_2\}]^+(\text{PF}_6^-)$  (**4a**),  $[(\eta^6\text{-C}_6\text{Me}_6)\text{Ru}\{(p\text{-TolN})_2\text{PPh}_2\}]^+(\text{BF}_4^-)$  (**4b**) and  $[(\eta^6\text{-C}_6\text{Me}_6)\text{Ru}\{(\text{MeN})_2\text{PPh}_2\}]^+(\text{BAr}^{\text{F}}_4^-)$  (**4c**) are collected in a separate file all\_cifs.cif.

2. The exchange rate constant  $k_{\text{ex}}$  and the corresponding free energy of activation  $\Delta G^\ddagger$  at the coalescence temperature  $T_c$  were calculated for the complex **3b** in dichloromethane- $d_2$  according to the [a] A.D. Bain, *Prog. Nucl. Magn. Reson. Spectrosc.*, 2003, **43**, 63-103. b) J. Sandström, "Dynamic NMR Spectroscopy", Academic Press, 1984]:

At the coalescence temperature, the  $k_{\text{ex}} = \frac{\pi(\Delta\nu)}{\sqrt{2}}$ ,  $\Delta\nu = 600\text{MHz} \bullet 1.029\text{ppm} = 617\text{Hz}$ ,

hence the  $k_{\text{ex}} = 1370\text{s}^{-1}$  at the  $T_c = 238\text{K}$ .

The free energy of activation  $\Delta G^\ddagger = -RT_c \ln\left(\frac{k_{\text{ex}} \bullet h}{k_B \bullet T_c}\right)$ , where  $k_B$  and  $h$  are the Boltzmann and the Planck constants, correspondingly. At the  $T_c = 238\text{K}$ , the  $\Delta G^\ddagger = 43.5\text{kJ/mol}$ .

3. The VT NMR of the complex **3b** in toluene- $d_8$  at 273 – 353K.

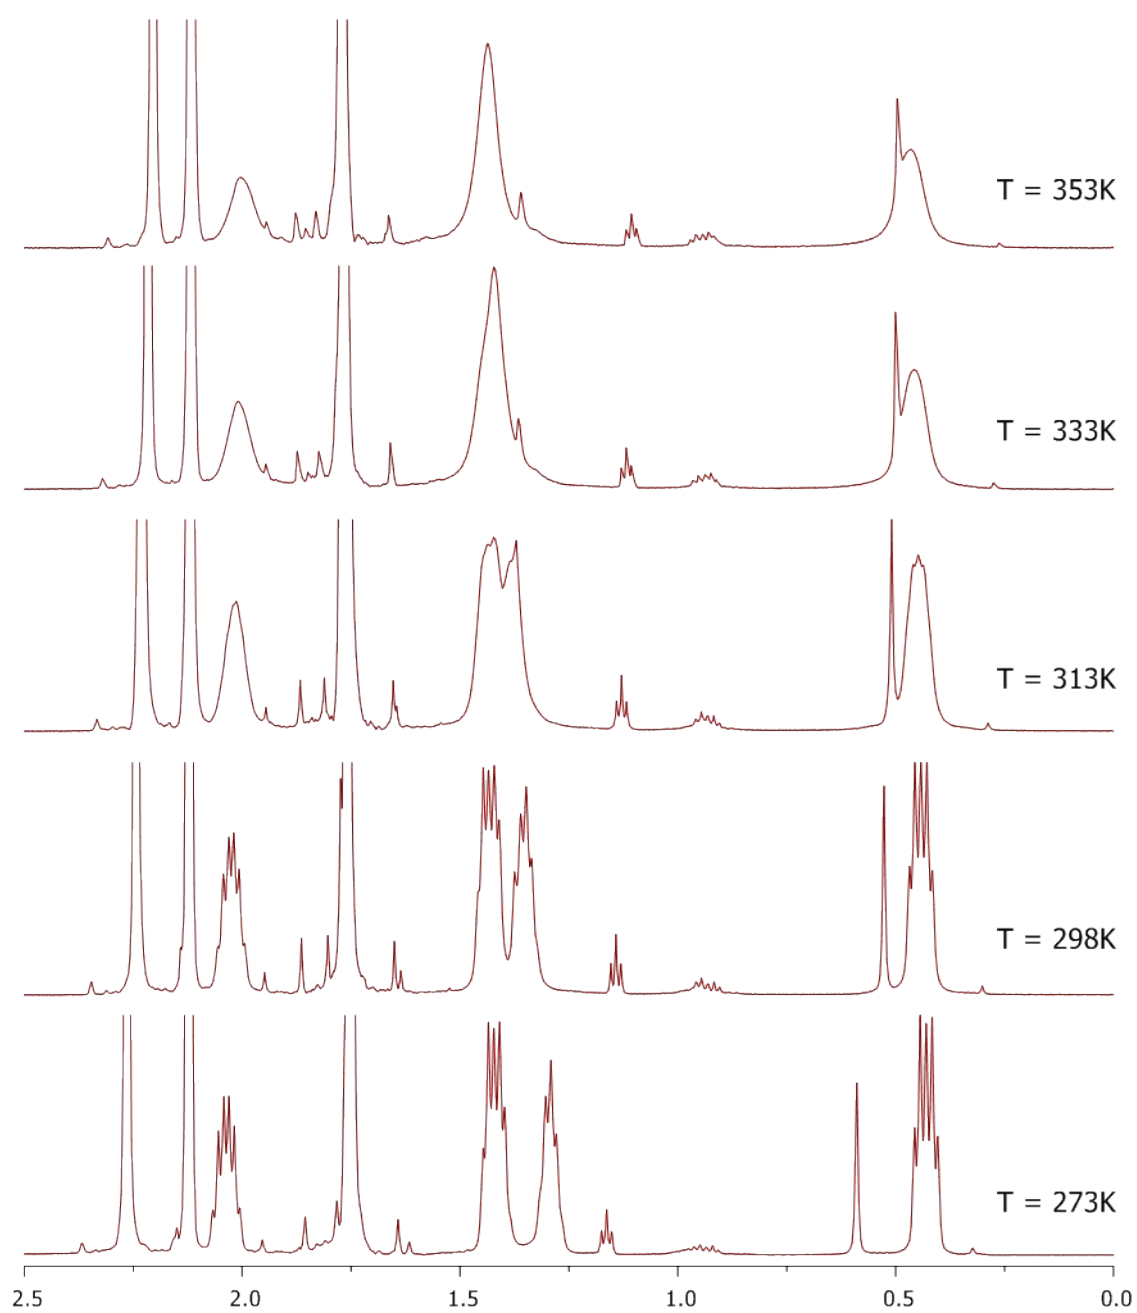

Supplement: c6dt03202h1.pdf [file c6dt03202h1.pdf]
